# Supplementary material
Source: MDPI journal article supplement (https://www.mdpi.com/2073-4433/9/1/30)
Supplement: s1 [file s1]

Article

# A Two-Year Study on Mercury Fluxes from The Soil Under Different Vegetation Cover in a Subtropical Region, South China

Ming Ma <sup>1,2</sup>, Tao Sun <sup>1,3</sup>, Hongxia Du <sup>1,4</sup>, and Dingyong Wang <sup>1,3,\*</sup>

<sup>1</sup> College of Resources and Environment; Southwest University; Chongqing 400715; China; maming@swu.edu.cn (M.M.); suntao81589@126.com (T.S.); duhx@swu.edu.cn (H.D.)

<sup>2</sup> School of Environment, Jinan University, Guangzhou 510632, China

<sup>3</sup> Chongqing Key Laboratory of Agricultural Resources and Environment, Chongqing 400715, China

<sup>4</sup> Research Center of Bioenergy and Bioremediation, Southwest University, Chongqing 400715, China

\* Correspondence: dywang@swu.edu.cn; Tel.: 86-23-6825-1691

Received: 28 October 2017; Accepted: 15 January 2018; Published: 19 January 2018

## Supplementary Material

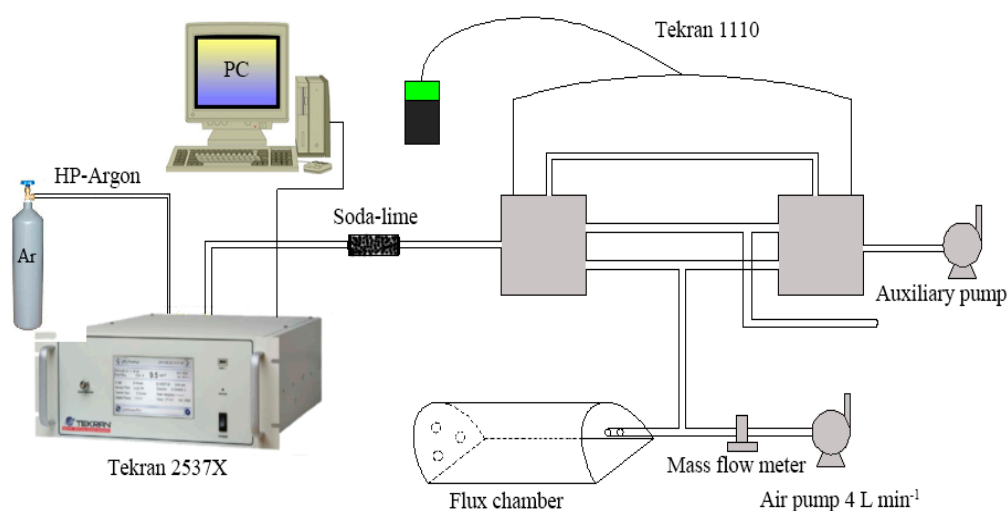

**Figure S1.** A diagram of GEM fluxes between soil-air interface.
